# Supplementary material
Source: Springer Nature journal article supplement (https://www.springermedizin.de/resource/supplementary/13058_2011_2938_MOESM13_ESM.pdf/9702934)

### Relapse free survival for all patients

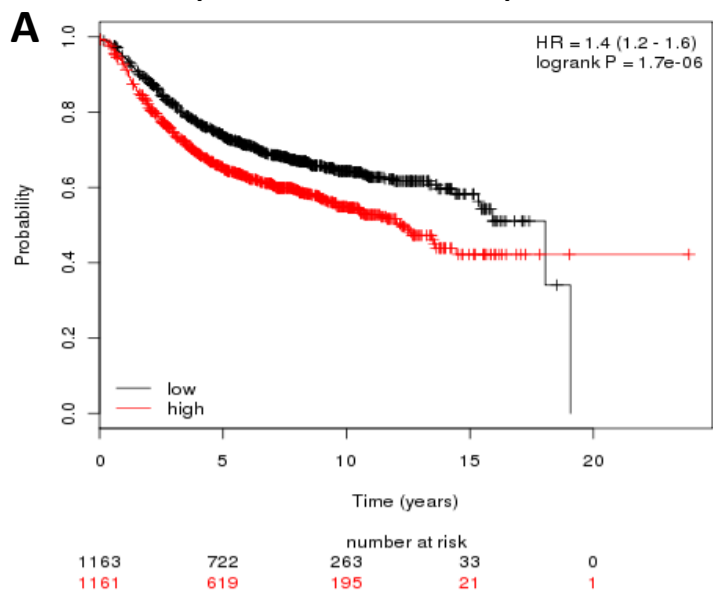

### Distant metastasis free survival for all patients

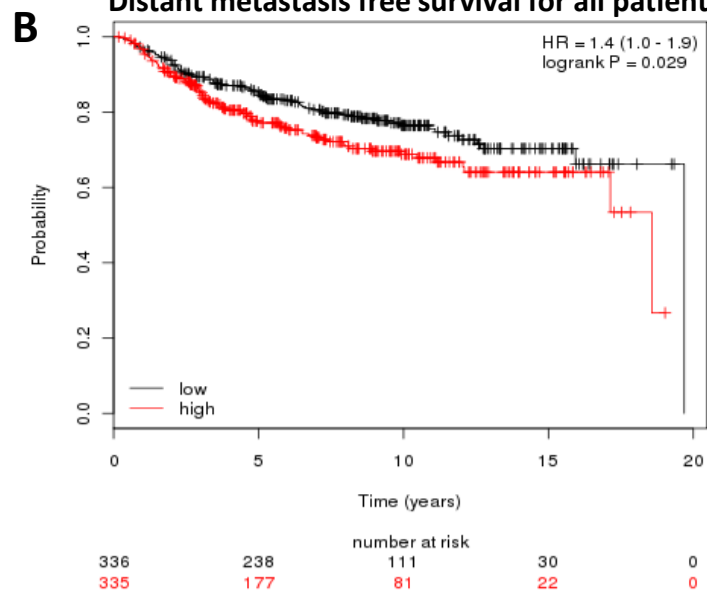

### Relapse free survival for untreated patients

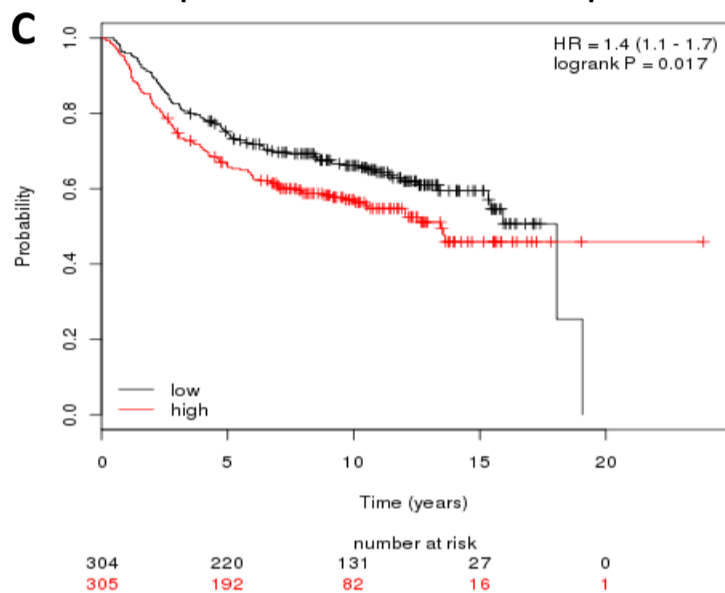

### Distant metastasis free survival for untreated patients

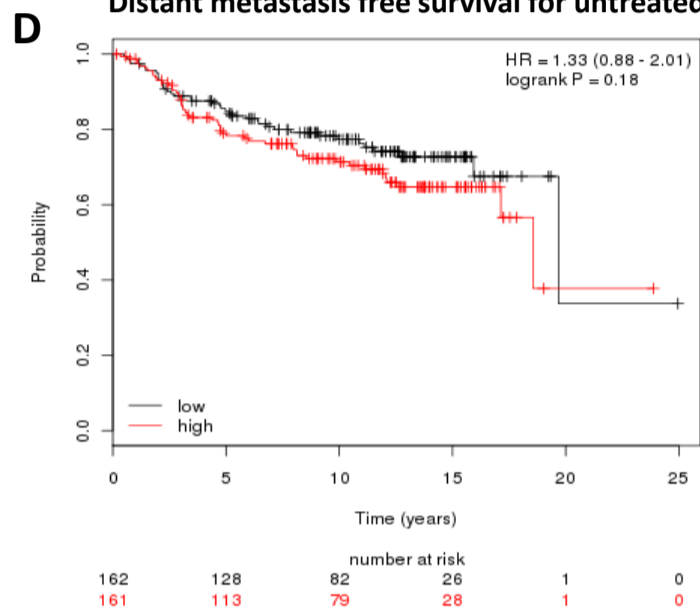

### Relapse free survival for ER+ patients

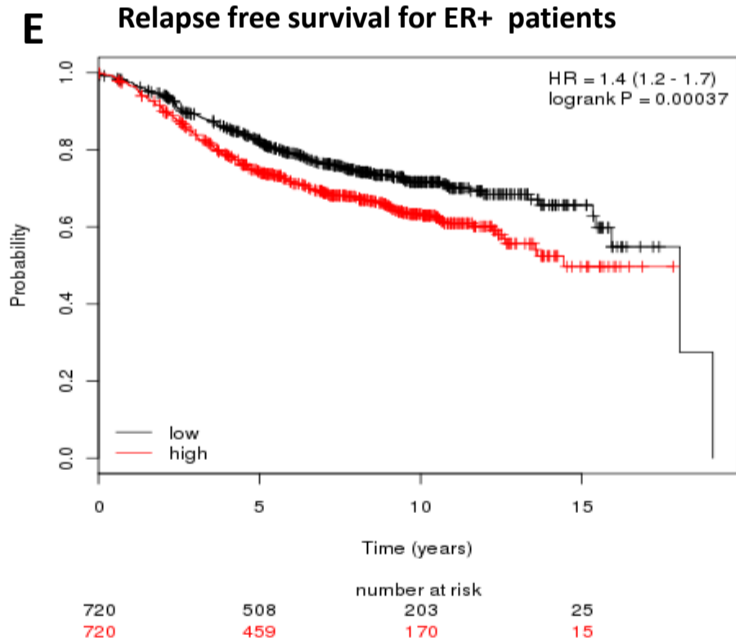

### Relapse free survival for ER- patients

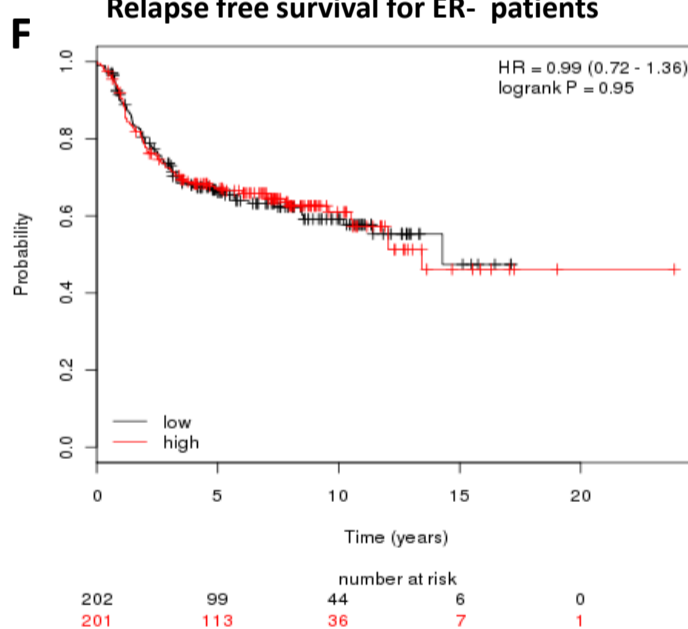

### Relapse free survival for ER+ endocrine treated

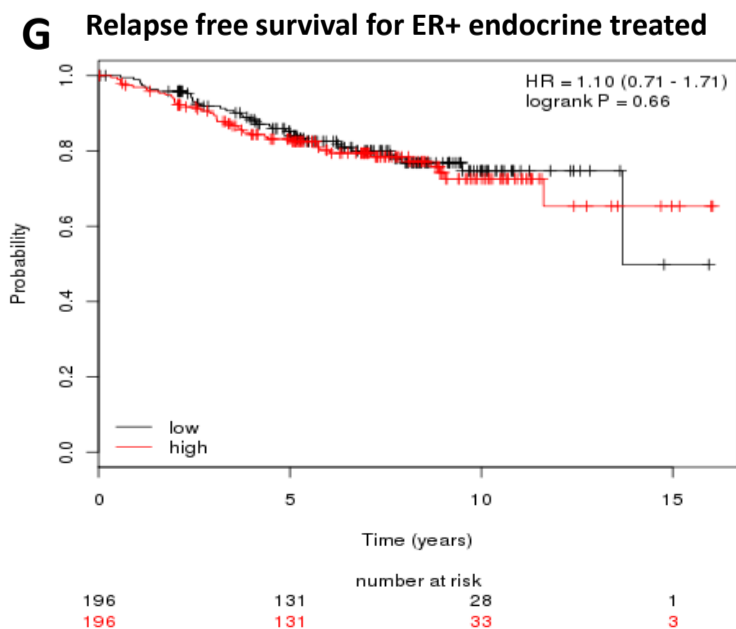

### Metastasis free survival for ER+ endocrine treated

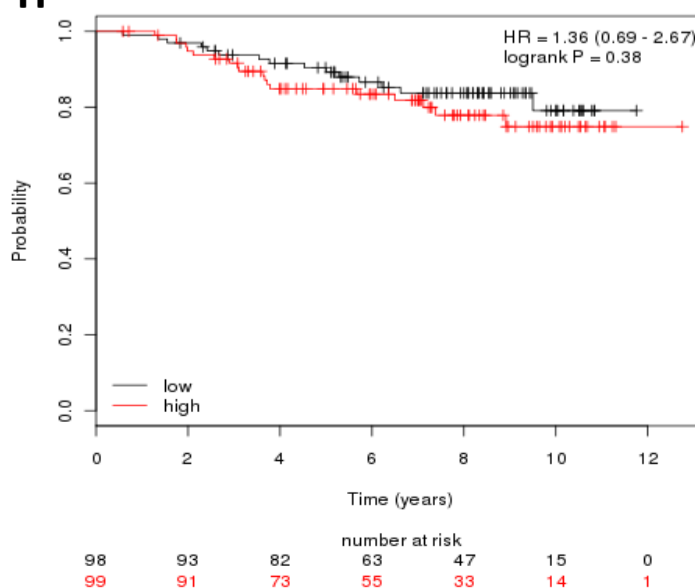

Supplement: MOESM13 [file 9702934]
